# Supplementary figures and images for: Gallic acid induces T-helper-1-like Treg cells and strengthens immune checkpoint blockade efficacy
Source: HighWire-hosted journal article supplement (doi:10.1136/jitc-2021-004037), 2022-07-01

## Supplementary figure 1

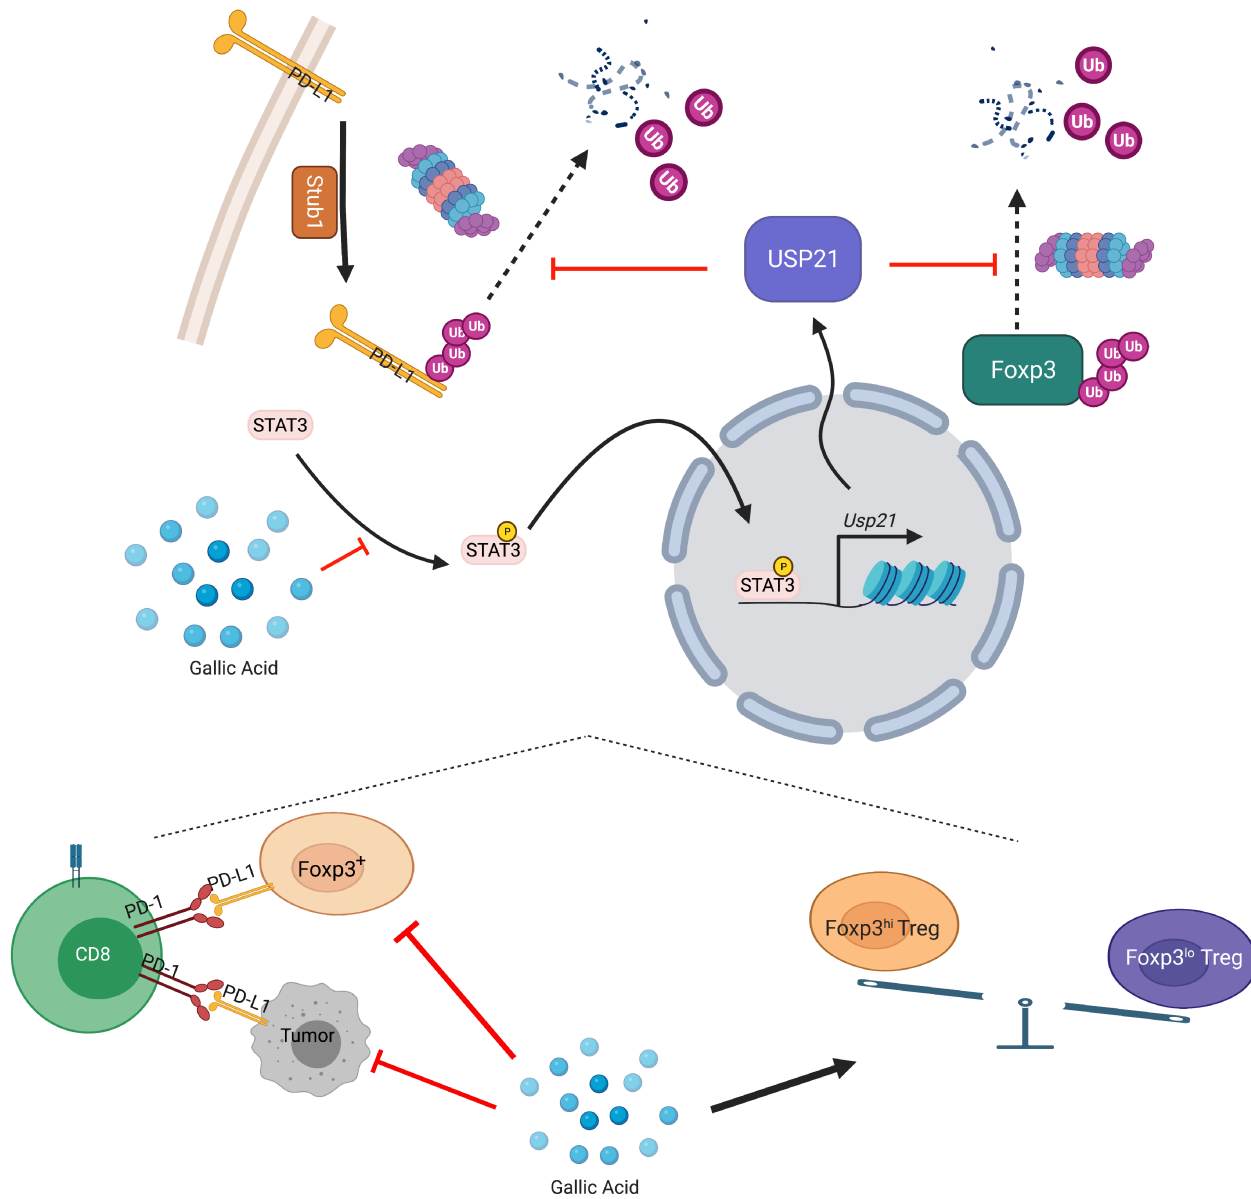

Supplement: jitc-2021-004037supp001_data_supplement.pdf [file jitc-2021-004037supp001_data_supplement.pdf]

## Supplementary figure 2

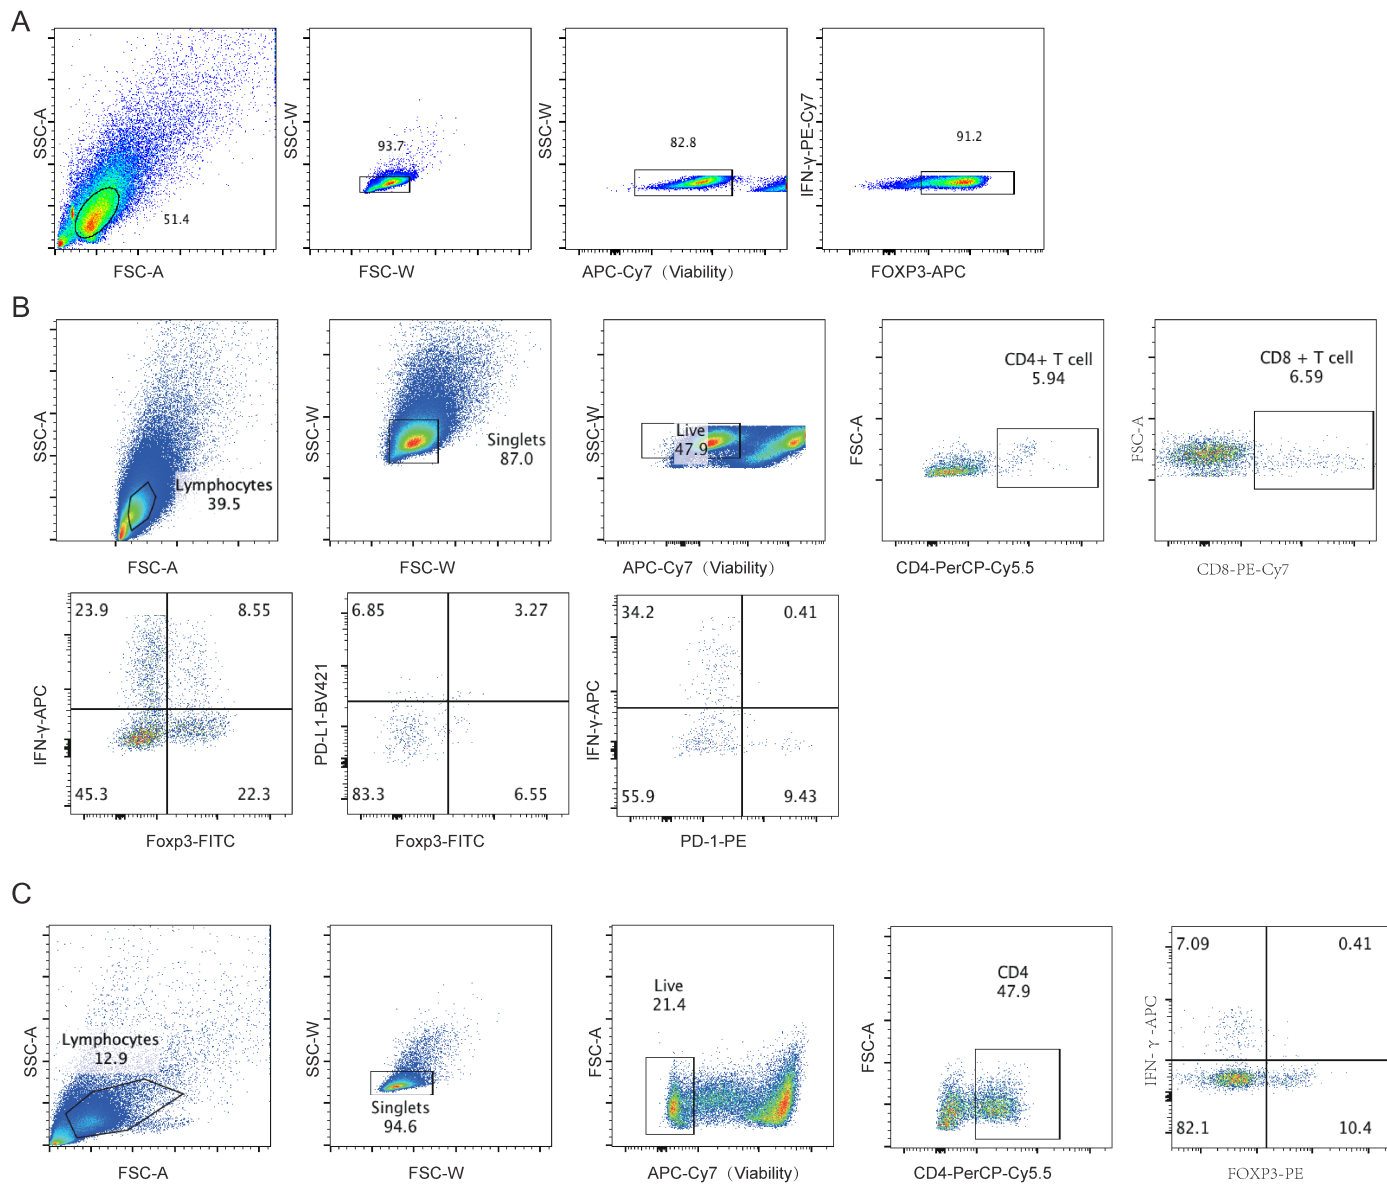

Supplement: jitc-2021-004037supp002_data_supplement.pdf [file jitc-2021-004037supp002_data_supplement.pdf]

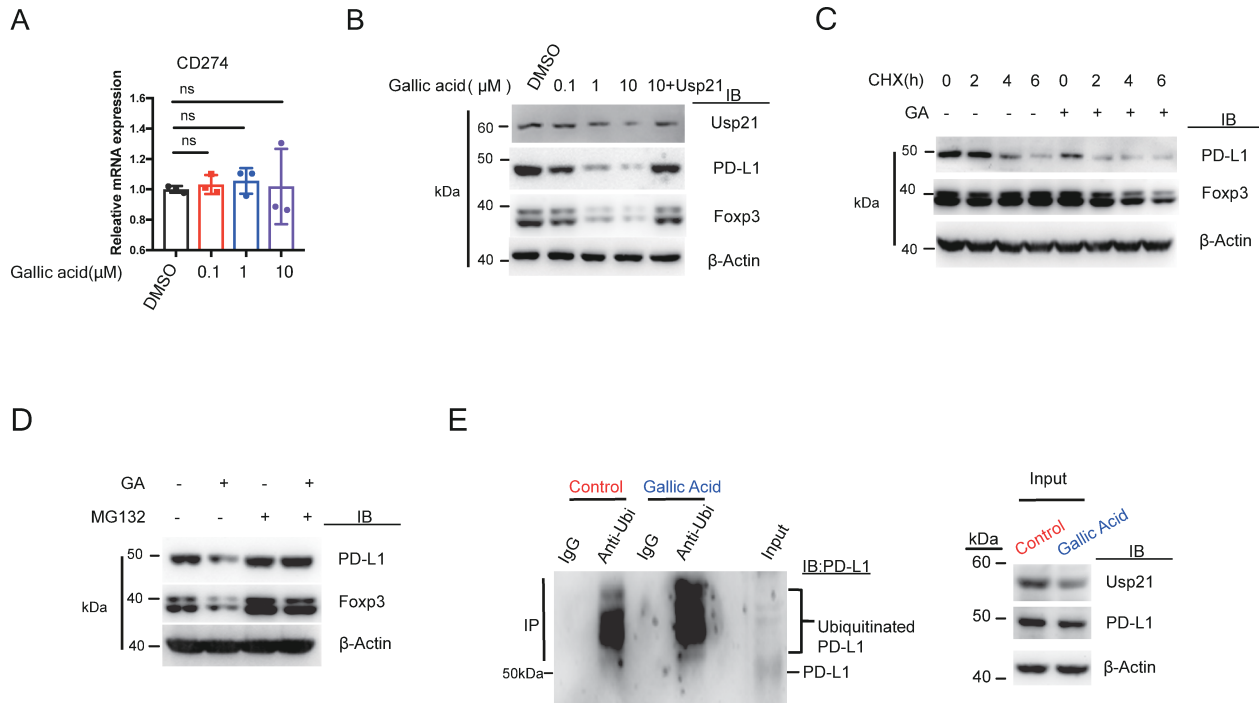

Supplement: jitc-2021-004037supp003_data_supplement.pdf [file jitc-2021-004037supp003_data_supplement.pdf]

## Supplementary figure 4

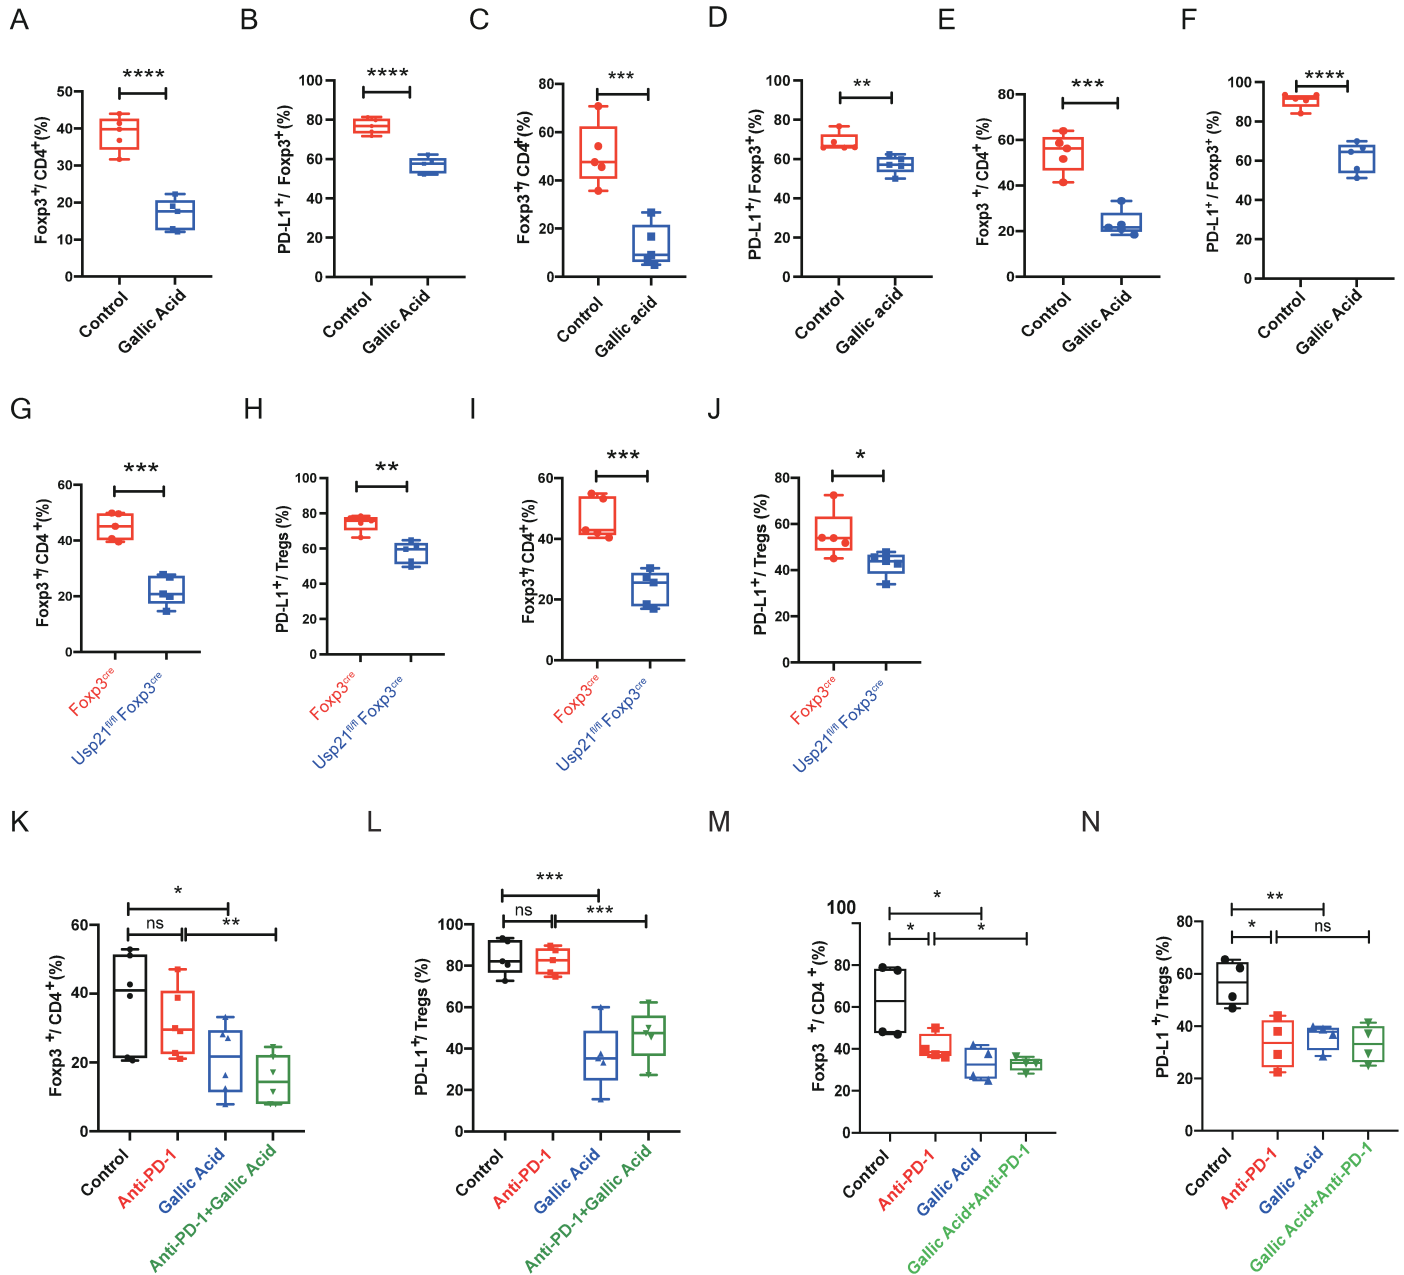

Supplement: jitc-2021-004037supp004_data_supplement.pdf [file jitc-2021-004037supp004_data_supplement.pdf]

## Supplementary figure 5

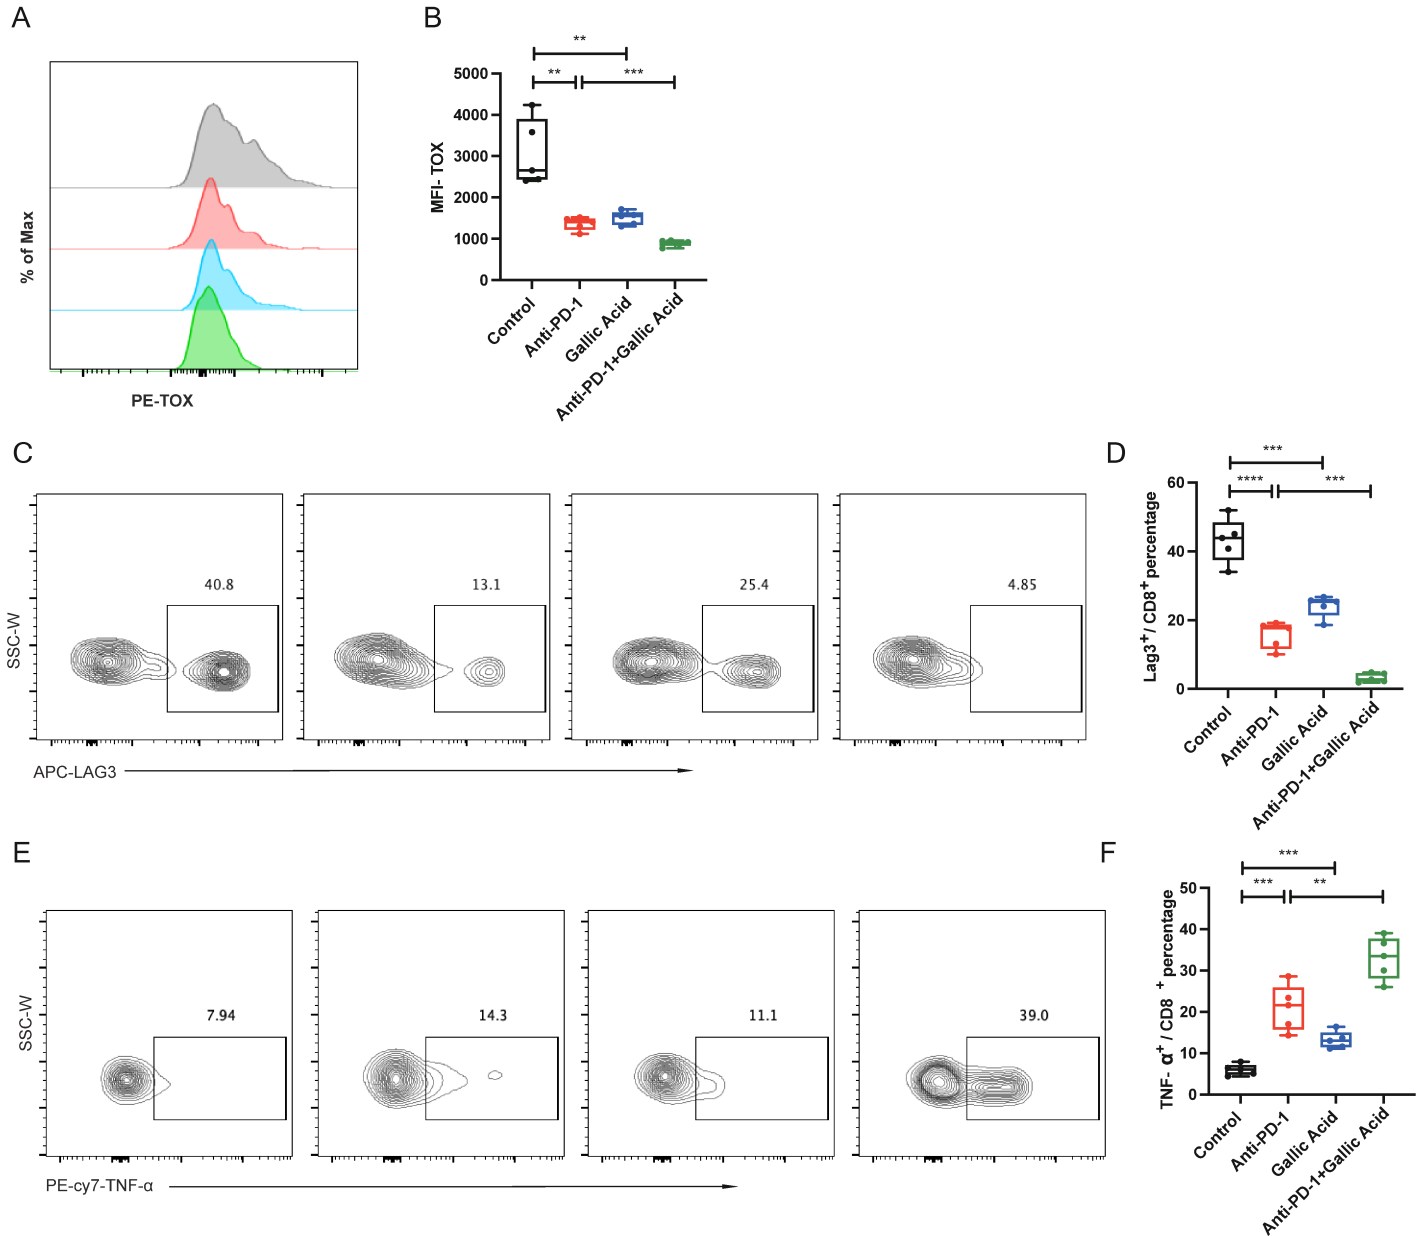

Supplement: jitc-2021-004037supp005_data_supplement.pdf [file jitc-2021-004037supp005_data_supplement.pdf]

Supplementary figure 6

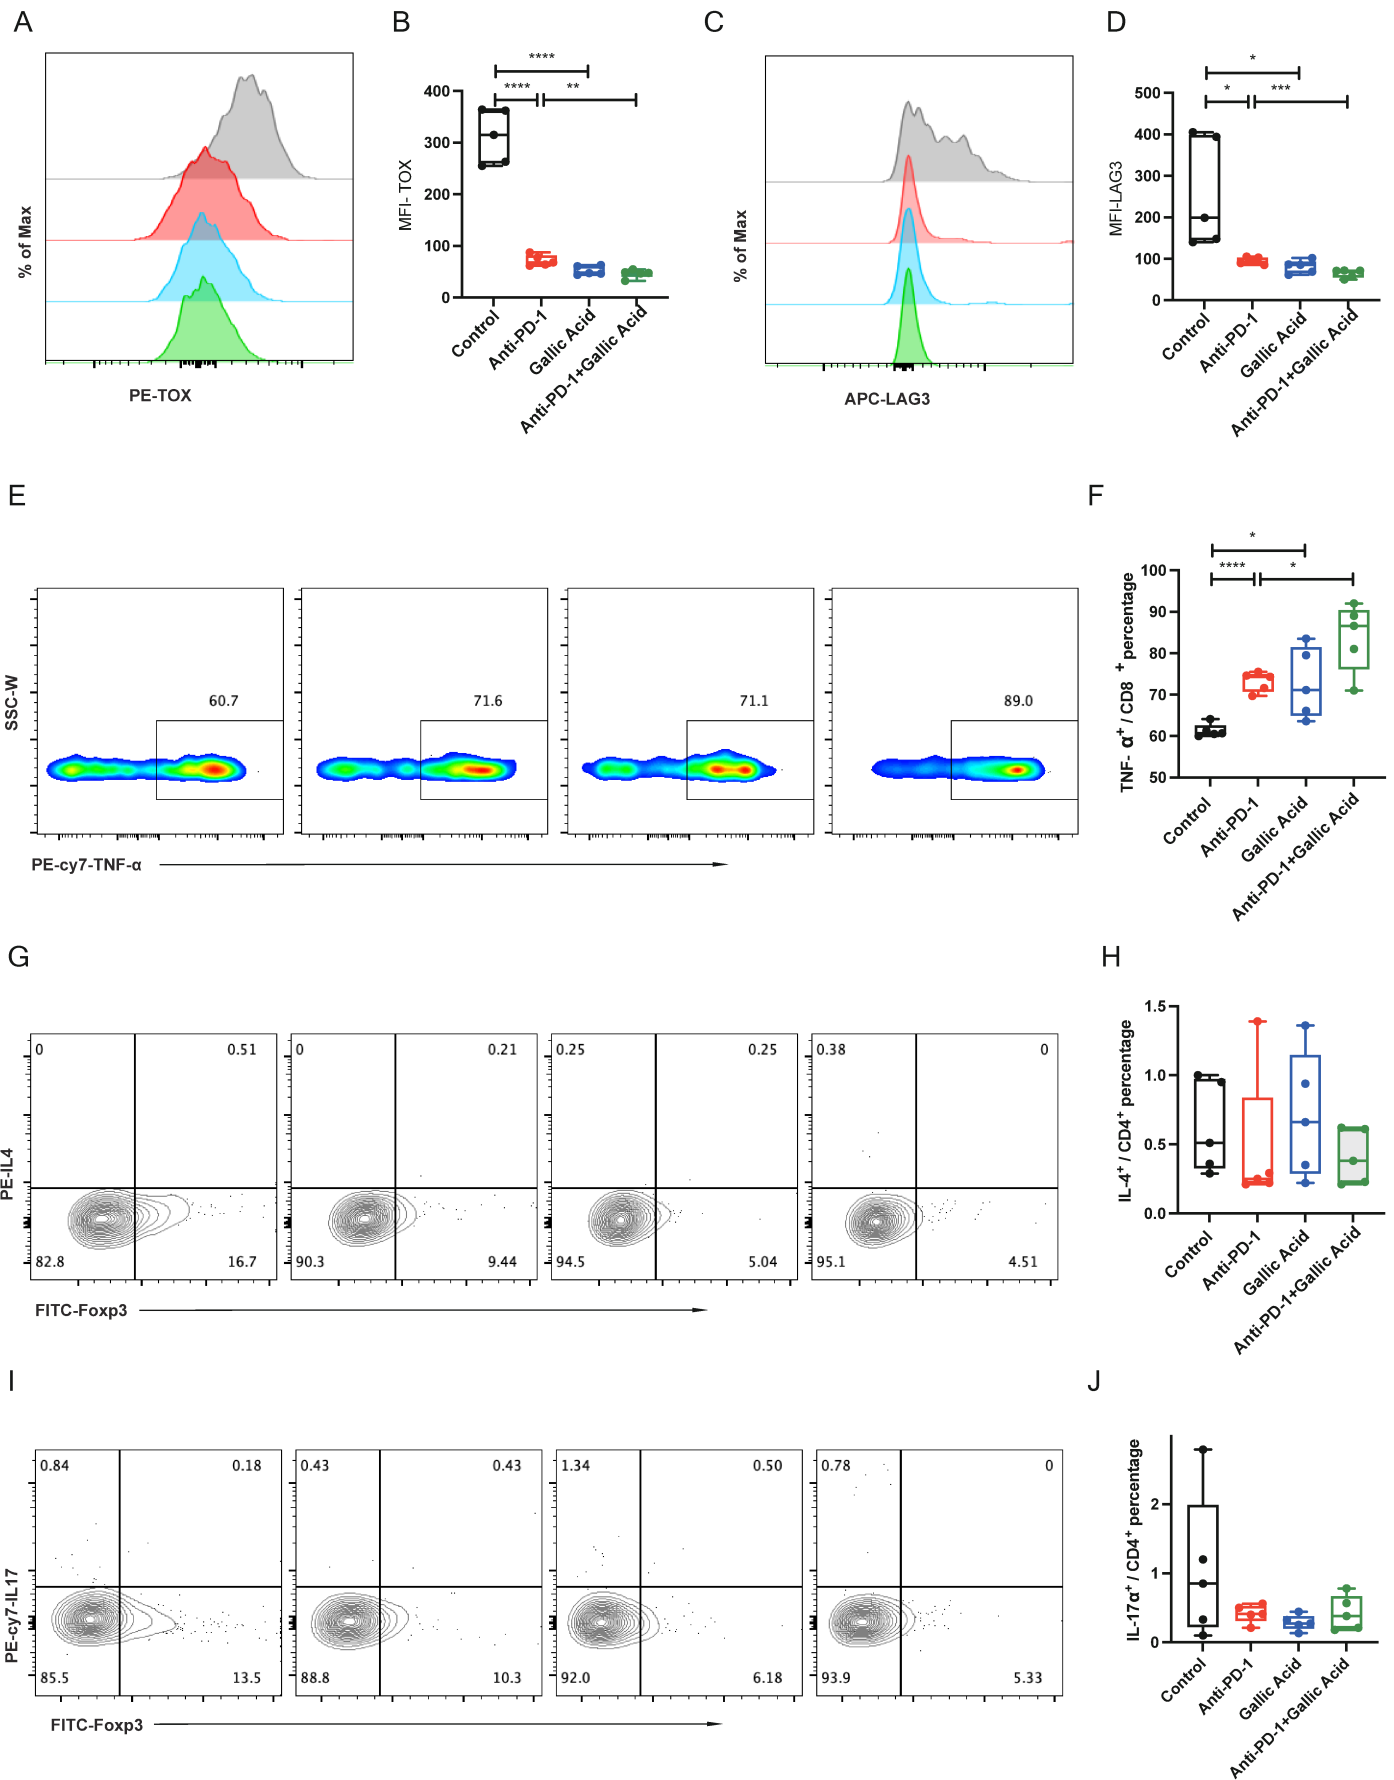

Supplement: jitc-2021-004037supp006_data_supplement.pdf [file jitc-2021-004037supp006_data_supplement.pdf]
